## 1 Trends of genetic changes uncovered by Env- and Eigen-GWAS in wheat and barley

2 Rajiv Sharma<sup>a</sup>, James Cockram<sup>b</sup>, Keith A. Gardner<sup>b</sup>, Joanne Russell<sup>c</sup>, Luke Ramsay<sup>c</sup>, William TB  
3 Thomas<sup>c</sup>, Donal M. O'Sullivan<sup>d</sup>, Wayne Powell<sup>a</sup>, Ian J. Mackay<sup>a1</sup>

4 <sup>a</sup>Scotland's Rural College (SRUC), Kings Buildings, West Mains Road, Edinburgh, EH9 3JG,  
5 United Kingdom. <sup>b</sup>The John Bingham Laboratory, NIAB, 93 Lawrence Weaver Road, Cambridge,  
6 CB3 0LE, United Kingdom; <sup>c</sup>The James Hutton Institute, Invergowrie, Dundee, DD2 5DA, United  
7 Kingdom; <sup>d</sup>School of Agriculture, Policy and Development, University of Reading, Reading, RG6  
8 6AR, United Kingdom

9 <sup>1</sup> To whom correspondence may be addressed. E-mail: Ian Mackay [ian.mackay@sruc.ac.uk](mailto:ian.mackay@sruc.ac.uk)

### 10 Abstract

11 The process of crop breeding over the last century has delivered new varieties with increased  
12 genetic gains, resulting in higher crop performance and yield. However in many cases, the  
13 underlying alleles and genomic regions that have underpinned this success remain unknown. This  
14 is due, in part, to the difficulty in generating sufficient phenotypic data on large numbers of  
15 historical varieties to allow such analyses to be undertaken. Here we demonstrate the ability to  
16 circumvent such bottlenecks by identifying genomic regions selected over 100 years of crop  
17 breeding using the age of a variety as a surrogate for yield. Using 'environmental genome-wide  
18 association scans' (EnvGWAS) on variety age in two of the world's most important crops, wheat  
19 and barley, we found strong signals of selection across the genomes of our target crops.  
20 EnvGWAS identified 16 genomic regions in barley and 10 in wheat with contrasting patterns  
21 between spring and winter types of the two crops. To further examine changes in genome structure  
22 in wheat and barley over the past century, we used the same genotypic data to derive eigenvectors  
23 for deployment in EigenGWAS. This resulted in the detection of seven major chromosomal  
24 introgressions that contributed to adaptation in wheat. The deployment of both EigenGWAS and  
25 EnvGWAS based on variety age avoids costly phenotyping and will facilitate the identification of  
26 genomic tracts that have been under selection during plant breeding in underutilized historical  
27 cultivar collections. Our results not only demonstrate the potential of using historical cultivar  
28 collections coupled with genomic data to identify chromosomal regions that have been under

29 selection but to also guide future plant breeding strategies to maximise the rate of genetic gain and  
30 adaptation in crop improvement programs.

### 31 **Significance Statement**

32 100 years of plant breeding have greatly improved crop adaptation, resilience, and productivity.  
33 Generating the trait data required for these studies is prohibitively expensive and can be  
34 impossible on large historical traits. This study reports using variety age and eigenvectors of the  
35 genomic relationship matrix as surrogate traits in GWAS to locate the genomic regions that have  
36 undergone selection during varietal development in wheat and barley. In several cases these were  
37 confirmed as associated with yield and other selected traits. The success and the simplicity of the  
38 approach means it can easily be extended to other crops with a recent recorded history of plant  
39 breeding and available genomic resources.

### 40 **Introduction**

41 In the last century, significant improvements in yield and quality have been reported in  
42 almost all crop species as a result of plant breeding driven by market demand (1). However, the  
43 growing demand for food, feed and fibre to meet the expanding global human population requires  
44 an acceleration in the pace of crop genetic improvement (2). Identification of the genetic loci  
45 responsible for these changes will help accelerate the genetic gains required to meet future food  
46 security needs, via their incorporation in marker assisted selection breeding strategies (3). Over  
47 the last decade, genome wide association studies (GWAS) has become a prominent method for  
48 genetic analysis in plants (4). In crops, GWAS require trait data on large collections of varieties or  
49 accessions, which is typically expensive to collect and can therefore result in underpowered  
50 studies with relatively low numbers of lines (5, 6). An alternative is to exploit the availability of  
51 historical data, such as that collected during varietal development programmes.

52 For almost every major crop, yield is the most important breeding target. Breeding  
53 programmes invest large amounts of resources into realising the incremental genetic gains in yield  
54 that are required for continual varietal improvement. Accordingly, the process of developing new  
55 crop varieties involves rigorous screening in large multi-location and multi-environmental trials over

56 several years. Large historical phenotypic data sets from such trials have been successfully  
57 employed for GWAS in the past (7), and in several cases have identified the functional genes  
58 underlying the genetic control of the investigated traits (8–11). However, the availability of seed for  
59 variety collections with appropriate trait data is not common for many crops. Alternatively, seed of  
60 historical varieties may be available, but the associated trait data may be lost or disjointed. In both  
61 cases, the cost of collecting *de novo* trait data can be prohibitive. In many cases however, the  
62 release date, subsequently termed here ‘age’, of varieties is known. Given that in most crops, the  
63 breeding process has improved the genetic potential of key agronomic traits over time, variety age  
64 can be used as a surrogate measure of merit and mapped in GWAS. This approach, in which  
65 environmental or non-genetic variables are treated as traits in GWAS to map loci associated with  
66 those variables, has been termed EnvGWAS (12). For many crops, the predominant genetic  
67 change over time has been to increase yield (e.g.(13)), and the age of a variety may function  
68 directly as a surrogate for yield, although loci detected may also be associated with other temporal  
69 changes. EnvGWAS on variety age can also be regarded as a simple genome-wide test for genetic  
70 loci under directional selection, which may be subsequently associated with traits. This approach  
71 may also provide a way of identifying alleles associated with adaptation (14) which otherwise have  
72 been difficult to detect. Finally, EnvGWAS can be a cost effective strategy since it can access large  
73 pre-existing datasets but is not dependent on historical or *de novo* trait data.

74 A related approach requiring no trait data is EigenGWAS (15). Using genotypic data alone,  
75 the singular value decomposition of the genomic relationship matrix provides loadings  
76 (eigenvectors) for each variety on each eigenvalue of the matrix. For the largest eigenvalues, these  
77 loadings are then treated as independent traits for GWAS. Significant associations with any  
78 particular component highlight genomic regions or markers of greatest importance for that  
79 eigenvalue, and therefore the potential major drivers of population structure. Subsequent study of  
80 varieties differing in these regions may also be interpretable in terms of drivers of adaptation.  
81 EigenGWAS and EnvGWAS have recently been used to study diversity among maize landraces  
82 and identify lines and traits suitable for downstream analysis without large scale phenotyping (12).

83 In this study, we demonstrate for the first time the utility of treating variety age as a  
84 surrogate trait for crop productivity when combined with EnvGWAS and EigenGWAS to identify  
85 target regions and quantitative trait loci (QTL) underpinning genetic improvements in crop  
86 performance that have occurred during modern plant breeding. This is a powerful but cost effective  
87 method that does not require extensive trait data or complex software. We demonstrate the utility  
88 of these complementary approaches by: i) using EnvGWAS on variety age to identify loci  
89 responsible for genetic improvement in four complimentary datasets of modern winter and spring  
90 types of wheat (*Triticum aestivum*) and barley (*Hordeum vulgare*) from the United Kingdom (UK)  
91 and Brazil. ii) Validating the results from (i) by GWAS on subsets of these varieties for which  
92 historic yield data were also available. iii) Evaluating the temporal changes of allelic state at the loci  
93 identified. iv) Performing EigenGWAS on the same four datasets. EigenGWAS compliments  
94 EnvGWAS in that it too does not required trait data and may also identify genomic regions that  
95 have undergone selection. However, unlike EnvGWAS, it does not explicitly search for regions  
96 associated with variety age and is more likely to detect features associated with local adaptation,  
97 which may change little in frequency over time. As far as we are aware, no EnvGWAS analysis  
98 has been published in plants for which variety age has been used as a trait. The combination of  
99 EnvGWAS with EigenGWAS used here provides insights into the recent breeding history and  
100 population structure of two of the world's most important crops, and highlights the effectiveness  
101 and simplicity of these approaches to study recent selection history without the requirement for  
102 phenotype data.

## 103 **Results**

### 104 **Year of variety release as a surrogate measure for yield**

105 The Pearson correlations between historical yield data and age of variety were calculated for the  
106 subsets of 192 UK wheat and 197 UK barley varieties for which historical yield data were available  
107 (**SI Appendix, Fig. S1**). High correlations between yield and year of release (range 0.896 – 0.974)  
108 were found in both UK data sets. This confirms year of release could be used as a good measure  
109 of genetic progress in UK wheat and barley yield potential. No historical yield data for the Brazilian  
110 wheat panel were available.

## 111 **EnvGWAS for variety age**

112 *EnvGWAS wheat*. Using variety age for EnvGWAS in the UK winter wheat panel ( $n=404$ ) identified  
113 thirteen significant ( $-\log_{10}(p) > 4.0$ ) genomic regions, of which four loci were found to be highly  
114 significant ( $-\log_{10}(p) > 6.0$ ), located on chromosomes 1A, 2A, 2D and 6A (**Fig. 1A, Table 1, SI**  
115 **Appendix, Table S1**). For Brazilian spring wheat ( $n=355$ ), three significant genetic loci were  
116 detected, two on chromosome 2B (251 cM, 318 cM) and one on 5A (710 cM), none of which were  
117 identified in the UK winter wheat panel (**Fig. 1B, Table 1, SI Appendix, Table S1**).

118 *EnvGWAS Barley*. We identified three highly significant genetic loci in the winter barley panel  
119 ( $n=297$ ), and seven in the spring barley panel ( $n=406$ ) (**Table 1; Fig. 1C-D**); a summary of the  
120 associated markers is listed in **SI Appendix, Table S2**. Two significant loci were identified in both  
121 barley panels (chromosome 3H, ~68-70 cM; 5H, ~20 cM) (**Fig. 1 and Table S2**). Subsequently,  
122 EnvGWAS was performed on the combined winter and spring panels ( $n=704$ ), identifying the same  
123 four significant loci we identified in the spring panel alone (**SI Appendix, Fig. S2A, Table S2 and**  
124 **Table 1**). We repeated the analysis using seasonal growth habit ('spring' or 'winter' types) as a  
125 covariate, without any major changes in results (**SI Appendix, Fig. S2B**). In addition, we  
126 performed GWAS on seasonal growth habit itself, identifying three major genetic loci on the long  
127 arms of chromosomes 1H, 4H and 5H (**SI Appendix, Fig. S2C**), corresponding to major flowering  
128 time and vernalization genes known to be the major determinants of winter and spring seasonal  
129 growth type (*PPD-H2* on chromosome 1H, *VRN-H2* on 4H and *VRN-H1* on 5H) (16, 17).

130 EnvGWAS for variety age was then repeated with these QTL as covariates (**SI Appendix, Fig.**  
131 **S2D**). The most significant results mainly on chromosome 5H from the analyses with and without  
132 covariates changed little. However, the magnitude of other significant peaks differed, such as the  
133 locus on chromosome 1H.

## 134 **Validation of EnvGWAS based on trait analysis and a multi-founder experimental population**

135 To validate the EnvGWAS analyses, we performed GWAS on the subset of 192 UK winter wheat  
136 varieties for which historical yield data were available together with EnvGWAS on variety age for  
137 direct comparison of the results. In this subset, we found that GWAS for yield identified the same  
138 genomic region on chromosome 1A (**Fig. S3A**) as was detected by EnvGWAS for variety age (**SI**

139 **Appendix, Fig. S3, Table S1**). This is the same region that we identified in EnvGWAS for variety  
140 age in the complete set of 404 UK wheat varieties. Interestingly, while the chromosome 5A QTL  
141 was detected with low-significance ( $-\log_{10}(p) = 4.45$ ) by GWAS on yield, it was not identified using  
142 EnvGWAS on variety age. In addition, EnvGWAS analysis of variety life-span also detected a locus  
143 on chromosome 1B that was not detected in any other of our analyses.

144 Similarly, EnvGWAS on variety age and GWAS on yield was repeated using the subset of 197  
145 winter and spring barley varieties for which historic yield data was available, detecting highly  
146 significant hits ( $-\log_{10}(p) > 4.0$ ) on chromosome 5H for variety age, variety life-span and yield,  
147 using seasonal growth habit as a covariate (**SI Appendix, Fig. S4, Table S2**). Although not  
148 identified in the larger panel of 703 varieties, analysis of our subset of 197 lines consistently  
149 identified a highly significant genetic locus on the short arm of chromosome 3H for variety age,  
150 variety life-span and yield. An additional peak was detected with EnvGWAS for variety life-span on  
151 the long arm of chromosome 2H.

152 To further validate our EnvGWAS findings, we analysed data from a 16 founder wheat multiparent  
153 advanced generation inter cross (MAGIC) population consisting of 550 recombinant inbred lines  
154 generated by inter-crossing 16 wheat varieties released between 1935 to 2004 (18). We found that  
155 the four major genomic regions previously identified by EnvGWAS of variety age on chromosomes  
156 1A, 2A, 2D and 6A were also significant in the MAGIC population for several yield and grain related  
157 traits, height, and yellow-rust resistance (**Table 2**). Further details of the 213 agronomic and  
158 disease resistance traits analysed and the corresponding significance levels are listed in (**SI**  
159 **Appendix, Table S3**).

#### 160 **Allele-shift over time**

161 To illustrate the changes in allele frequency present in our variety collections over time, we  
162 generated rocket plots (**SI Appendix, Fig. S5–S8**) for the major genomic regions identified by  
163 EnvGWAS on variety age (**SI Appendix, Table S4-S7**). Different patterns and intensity of selection  
164 were evident across chromosomal regions over time. For wheat, these fell into three broad  
165 classes: (1) Late introduction of ‘modern’ alleles followed by a rapid increase in frequency (**SI**  
166 **Appendix, Fig. S5A**), (2) retention of both ‘modern’ and ‘old’ alleles at similar frequency across

167 time (e.g. **SI Appendix S5E**), (3) relatively early introduction of the ‘modern’ allele, followed by its  
168 retention at low frequency (e.g. **SI Appendix S5F**). Details of the alleles-shifts examples are  
169 provided in the Supplementary Notes. In barley, the rocket plots illustrated both gradual and rapid  
170 shifts in allele frequency at the genomic regions identified by EnvGWAS on variety age (**SI**  
171 **Appendix, Fig. S5I-N**). For example, for the UK spring barley genetic locus on chromosome 7H  
172 (~8.8 Mbp), only one allele was present until 1992 (**SI Appendix, Fig. S5N and Table S6**), after  
173 which the ‘modern’ allele remained at low frequency, even among modern varieties. A genomic  
174 region on chromosome 5H which was identified separately in winter and spring barley displays a  
175 pattern where the ‘modern’ allele is introduced in 1986, after which both alleles are found at  
176 intermediate frequencies among the most recent varieties in winter barleys. However, modern  
177 spring barleys were predominantly of ‘modern’ allele type.

## 178 **EigenGWAS scans**

179 While EnvGWAS allowed us to use variety age to investigate the genomic regions underlying QTL  
180 for yield and adaptation, we hypothesised that the complementary method, EigenGWAS, would  
181 allow us to detect changes in larger scale structural variants in our target crop genomes over time.  
182 After determining the first ten PCs in each of our UK and Brazilian wheat populations (**SI**  
183 **Appendix, Table S8**), EigenGWAS detected numerous significant hits (N=11567 SNPs with  $-\log_{10}$   
184 ( $p$ ) >4.0) (**Fig. 2 & SI Appendix, Table S9**). Seven genetic loci distributed on chromosomes 1A,  
185 1B, 2B, 5B, 6A and 6B were found to be significant with multiple PCs, as well as within the  
186 Brazilian (spring) and UK (winter) panels (**Fig. 2**). These loci corresponded to major chromosomal  
187 introgressions from related cereal species into wheat (**SI Appendix, Table S9**). For instance, the  
188 1B locus co-locates with the chromosome 1B/1R introgression from rye (*Secale cereale*), which is  
189 known to regulate multiple traits including disease resistance and yield (19, 20). We identified an  
190 additional seventeen putative introgressions that were supported by a recent introgression survey  
191 by (21), along with another 58 novel putative introgressions (**SI Appendix, Table S9**). Among  
192 these novel putative introgressions were regions on chromosome 5A, depicted in **Fig. 2** as 5A\_2  
193 and 5A\_3, which displayed amongst the most significant hits across the UK and Brazilian wheat  
194 data sets and multiple PCs. Interestingly, two highly significant genomic regions (1A\_2 and 5A\_5)



195 identified by EigenGWAS on PC2 in winter wheat were also detected by GWAS on yield in the  
196 validation data set (**SI Appendix, Table S13**). In addition, three genomic regions (5B\_2, 6A\_1 and  
197 7B\_1) identified in the winter wheat EigenGWAS analysis were also detected in EnvGWAS on  
198 variety age, suggesting both approaches are not exclusively identifying different genomic regions  
199 (**SI Appendix, Table S13**).

200 In contrast to wheat, EigenGWAS in the winter and spring barley varieties did not detect any major  
201 loci with highly significant peaks across multiple PCs (**Fig. 3** and **SI Appendix**. PCs variation in  
202 **Table S8 & results in Table S11**). Although two genomic regions in winter (1H\_3 and 4H\_3) and  
203 three in spring barleys (2H\_3, 3H\_1 and 7H\_1) were identified in at least three PCs. Nevertheless,  
204 peaks were also identified close to the locations of known genes controlling flowering time and  
205 height (**SI Appendix. Table S11**), e.g. the PC5 hit on chromosome 3H ~632 Mbp (explaining  
206 2.46% of the variation) is near the semi-dwarfing gene *sdw1* in spring barley. Interestingly, one of  
207 the most significant hits in the spring barley panel (3H\_1, identified using PC1 and explaining  
208 6.91% of the variation) was also detected using EnvGWAS on variety age and by GWAS on yield  
209 (**SI Appendix. Table S14**). Given the location of this hit in a highly recombinogenic region of the  
210 barley genome, and that it was detected only in the spring barley panel, this may indicate a major  
211 locus under selection specific to spring barley breeding. No strong peak in winter barley was found  
212 for PC1, with the most significant peak obtained using PC6. As UK elite winter barley is more  
213 genetically diverse than UK elite spring barley, these results indicate that UK elite winter barley  
214 may be subjected to weaker selection pressures. Interestingly, hits on genomic regions (5H\_2 and  
215 7H\_1) from the spring barley EigenGWAS analysis were also identified in GWAS analysis of  
216 seasonal growth-habit and variety age, highlighting the importance of these loci under selection (**SI**  
217 **Appendix. Table 14**).

## 218 Discussion

219 We demonstrate that use of variety age for EnvGWAS can detect regions of crop genomes  
220 under selection during breeding. In addition, we show variety age is a good proxy for yield, with the  
221 genetic loci identified for wheat validated in an independent experimental multi-founder population  
222 (18). Lastly, we showed that the genetic loci detected by EnvGWAS showed gradual, as well as



223 sharp, shifts in allele-frequency over time, indicating subtle changes at these loci by breeders,  
224 which are less discernible to detection using approaches such as partitioning the populations on  
225 age and searching for differences based on *F<sub>st</sub>*.

226 It is perhaps not surprising that selection of loci varies between the UK winter and Brazilian spring  
227 wheat, given that the target agricultural environments and growth types are very different. Wheat  
228 yields in both Brazil and the UK have improved greatly over the years (13, 22). Our contrasting  
229 results in wheat indicate that different sets of genes have been selected over the years, and are  
230 likely involved in both yield component and local adaptation traits. Future efforts will shed more  
231 lights on the types of genes underpinning these loci, allowing changes in allelic diversity over the  
232 years to be investigated.

233 Our results for UK barley contrast with those for UK wheat. Firstly, more hits were associated with  
234 variety age in spring compared to winter barley, and secondly an identical peak on chromosome  
235 5H (at ~19cM, ~7.5 Mbp) was identified in both panels (as well as in the combined spring and  
236 winter analysis). This is surprising as breeders rarely cross spring and winter barley, and since the  
237 breeding targets in the two pools differ (malting and largely animal feed, respectively). To further  
238 investigate this region, we tested the candidate SNPs against phenotypic data available from  
239 national trial data (***SI Appendix, Table S10***), finding it to be associated with several malting quality  
240 traits, powdery mildew resistance and yield in fungicide untreated trials. These findings suggest the  
241 potential importance of this region for breeding for disease resistance and end use quality.

242 Interestingly this region on 5H houses a cluster of terpene synthases that have been implicated in  
243 fungal disease resistance in other species (23) and that potentially have been selected alongside  
244 direct targets such as *Mla* and *mlo* genes (24).

245 The detection of significant hits with EnvGWAS provides an opportunity to explore their relationship  
246 with yield and other agronomically important traits. Some hits coincide with previously published  
247 QTL in wheat and barley, for example the highly significant loci on wheat chromosomes 1A and 6A  
248 (25–27). Our EnvGWAS hits on chromosomes 1A and 2A also overlapped with the reduced  
249 diversity peaks identified in the recent analysis of the UK wheat pedigree by (28). Specifically, the

250 2A locus may correspond to a stripe rust resistance gene described by (29), as the peak markers  
251 overlap. Interestingly a group of R genes *Lr37-Yr17-Sr38* (30) which were important sources of  
252 resistance in the past also lie in this region and might be more plausible candidates, rising in  
253 frequency before their resistance broke down. Similarly the highly significant genetic locus on the  
254 short arm of barley chromosome 3H for variety age and yield found in the subset of 197 barley  
255 lines corresponds to the genomic region associated with the a malting quality trait, hot water  
256 extract, in UK spring barley that demonstrated a major change in allele frequency over the last  
257 thirty years (31). In addition, the region identified on chromosome 3H (~68cM) for variety age in  
258 winter barley in the larger dataset has been shown previously to be associated with yield  
259 component traits (grain length and grain area) in European winter barley (32).

260 Similarly, in barley, the region identified on chromosome 2H (~65cM, ~621 Mbp) for variety life-  
261 span has been shown previously to be associated with yield and yield component traits (32, 33)  
262 and may correspond to the *OsBR1/D61* candidate genes reported previously that are associated  
263 with yield traits in barley (32, 33).

264 This is interesting as old varieties, despite being less-productive than modern varieties, were under  
265 cultivation for longer periods. It may however be noted that with the introduction of modern  
266 breeding practices yield increases, but with drastic effects on variety life-span due to the more  
267 frequent introduction of new varieties that outperform contemporary varieties. In wheat, EnvGWAS  
268 on variety life-span also identified a hit on chromosome 1A that co-located with a hit for variety age.  
269 This further indicates a direct relationship between variety age and variety life-span in wheat and  
270 barley.

271 Using EigenGWAS, we detected major introgressions in the wheat varietal panels investigated,  
272 with several of these found to be in common between the UK winter and Brazilian spring wheat  
273 panels, indicating their wide use in breeding. (18), analysing the 16 founder MAGIC population we  
274 used in our validation studies here, proposed a major role for multiple introgressions from wild  
275 species in UK wheat breeding to date. In contrast, EigenGWAS results in barley provide no  
276 evidence of a similar pattern of introgressions in either the winter or spring panels. Wheat and  
277 barley breeding differ in their exploitation of genetic resources. In wheat, several alien-

278 introgressions from related species are known to have occurred (34). While wheat is an  
279 allohexaploid and can support large tracts of non-recombining alien chromosome, this may not be  
280 the case in diploid barley. However, examples of introgressions in barley from landraces and  
281 spontaneous mutant lines for agronomically important genes have been reported, such as the  
282 semi-dwarfing allele *sdw1d* from the variety Diamant and the disease resistance gene *mlo11* from  
283 Ethiopian landraces (24, 35).

284 Interestingly, within the genomic region of 6A\_1, detected by EigenGWAS in wheat (a non-  
285 recombining peri-centromeric region) lies the gene *TaGW2* (36) which influences grain-weight and  
286 protein content traits that further suggest that the present approach is very effective in discovering  
287 genomic regions undergoing selection for yield. Another interesting finding is that the semi-  
288 dwarfing *Rht2* gene in wheat (chromosome 2D) was not detected despite its importance in the  
289 breeding history of the crop. This could be due to population structure control of the analyses. In  
290 the case of *Rht2*, it is noteworthy that GWAS on a panel of French, German and UK lines failed to  
291 detect an effect on yield or height unless a locus specific marker was used (37, 38), suggesting  
292 weak LD and low marker coverage on the 4D chromosome as the cause of failure here too.

## 293 **Conclusion**

294 Breeding has resulted in considerable and sustained genetic improvement of wheat and barley in  
295 recent decades, and our results identify at least some of the major loci that have contributed, and  
296 are still contributing, to these improvements. Using EnvGWAS, we demonstrate the utility of  
297 analysing variety age as a surrogate for traits selected by breeders to detect the genetic loci under  
298 selection over time, and to assess the temporal changes in their respective allele frequencies. For  
299 UK cereals, trends over time suggest that these loci are likely QTL for yield or yield components.  
300 While the resolution of this study in the non-recombining peri-centromeric region is insufficient to  
301 definitively associate known QTLs with the loci we have found, several such QTLs were found.  
302 EigenGWAS on the same data proved a simple method of detecting contrasting features of  
303 genome organisation in wheat and barley, and in some cases these too could be related to traits.  
304 We advocate the use of variety age as a surrogate trait, and the use of EnvGWAS and  
305 EigenGWAS to identify the genetic loci under selection that have underpinned the productivity

306 gains made via breeding. These extensions to GWAS that exploit historical datasets are useful  
307 additions to the analysis toolbox of crop quantitative genetics.

## 308 **Materials and methods**

### 309 **Germplasm, age and trait data.**

310 For both wheat and barley, we selected two panels of varieties representing national list entries  
311 and some older varieties from the UK (404 winter wheat; 297 winter and 406 spring barleys) and  
312 Brazil (355 spring wheat) (**Table S12**). The Brazilian spring wheat panel included entries released  
313 between 1922 to 2013. Year of varietal release and trait data were obtained from (39). The UK  
314 wheat panel consists of winter wheat varieties that were either registered or in use from 1916 to  
315 2010. The winter and spring barley panels consisted of varieties grown in the UK from 1960 to  
316 2016. Only two-rowed spike morphology types were included and all hybrid varieties were  
317 excluded. Variety age for UK germplasm was determined from the year of entry into national list  
318 trials or from the first reported year of trial data and was manually checked across different local  
319 data and published sources ((13); <https://ahdb.org.uk/ri> &  
320 <https://www.gov.uk/government/publications/plant-varieties-and-seeds-gazette-2020>  
321 <https://www.niab.com/services/seed-certification/botanical-descriptions-varieties>) with unresolvable  
322 ambiguities removed, reducing the UK wheat panel from 450 to 404 varieties. Following (13), only  
323 varieties with either three years trials data or equivalently which were known to be successful in  
324 national list trials were included in the dataset. In addition to variety age, we computed life-span of  
325 UK varieties as the difference between the last and first year in national trials plus one. This is  
326 usually equally to the total number of years each variety remained in trial, though with some rare  
327 breaks in the testing sequence over years. Grain yield data for the UK wheat and barley panels  
328 were sourced from (13).

### 329 **Genotyping**

330 Genotypic data were sourced from NIAB ([https://www.niab.com/research/agricultural-crop-re-](https://www.niab.com/research/agricultural-crop-research/resources)  
331 [search/resources](http://www.barleyhub.org/projects/impromalt/)) and JHI (<http://www.barleyhub.org/projects/impromalt/>) by permission through  
332 WAGTAIL and IMPROMALT projects.

333 For wheat, 14654 SNPs derived from genotyping with the 90K Illumina iSelect SNP array (Wang et  
334 al. 2014) generated within the Biotechnology and Biological Sciences Research Council grant  
335 BB/J002542/1 were sourced with permission from NIAB, and available at  
336 <https://www.niab.com/research/agricultural-crop-research/resources>. For barley, 43799 SNPs  
337 genotyped using the 50K Illumina iSelect array (40) were sourced from (31). Genetic maps for  
338 wheat (41) and barley (31, 40) were previously described. The physical map locations of wheat  
339 and barley SNPs were retrieved from (42) and (40), respectively. SNPs with a minor allele  
340 frequency <5%, missing values <10% and heterozygosity >10% were removed, leaving 12656  
341 wheat SNPs and 25562 barley SNPs for downstream analyses.

#### 342 **EnvGWAS and EigenGWAS analysis**

343 EnvGWAS and EigenGWAS analyses were performed using the R-package GWASpoly (43)  
344 implemented in R version 3.5.2 (<http://www.R-project.org/>). To determine the population structure  
345 of the panels, principal component analysis (PCA) was performed using the R-package SNPRelate  
346 (44). The first ten principal components associated with the largest eigenvalues were used for  
347 EigenGWAS. Population structure and kinship effects were controlled by inclusion of a mixed  
348 model of a canonical relationship (kinship) matrix (45), generated from a subset of SNPs (741 for  
349 wheat and 2500 for barley) pruned based on genetic positions. For ease of comparison across  
350 GWAS scans, the threshold for significance was set to  $-\log_{10}(p\text{-value})= 4.0$  which in several GWAS  
351 scans was above the threshold obtained using false discovery rate  
352 (<http://www.strimmerlab.org/software/fdrtool/index.html>). Manhattan plots and circular plots were  
353 generated using R-packages qqman (46) and CMplot (47), respectively.

#### 354 **MAGIC wheat analysis**

355 The significant SNPs from the wheat EnvGWAS were used for validation against agronomic traits  
356 identified in the 'NIAB Diverse MAGIC' population (18). Analysis was performed in R using  
357 adjustments for the funnel structure of the cross (48). All data used were obtained from the  
358 following websites that hosts the genotyping and phenotyping data of the 550 MAGIC-diverse RILs  
359 <http://mtweb.cs.ucl.ac.uk/mus/www/MAGICdiverse/index.html>.

## 360 **Data availability**

361 Genotypic data sets of the study are available from NIAB, UCL and JHI via following websites:

362 <https://www.niab.com/research/agricultural-crop-research/resources>

363 <http://mtweb.cs.ucl.ac.uk/mus/www/MAGICdiverse/index.html>

364 <http://www.barleyhub.org/projects/impromalt/>.

## 365 **Acknowledgments**

366 This project was part funded by projects IMPROMALT BB/K/0070251/1 and WAGTAIL  
367 BB/J002542/1, jointly funded by the BBSRC and UK wheat and barley breeders; and by direct  
368 funding of Rajiv Sharma from SRUC. We thank Mark Looseley and Hazel Bull (JHI), for sharing the  
369 genotypic data set of the barley varieties analysed here, as well as Chin Jian Yang, Ian Dawson  
370 and David Marshall (SRUC) for helpful discussion throughout the work.

## 371 **Figure Legends**

372 **Fig. 1.** Wheat EnvGWAS for variety age. Manhattan plots of the four panels are shown. On the x-  
373 axis genetic positions are based on the consensus map (41) are displayed for (A) UK winter wheat  
374 and (B) Brazilian spring wheat panels; a pseudo-genetic map positions that relates to the physical  
375 positions (40) of the UK winter (C) and spring (D) barley panels are shown. On the y-axis  
376  $-\log_{10}(p)$ -values are displayed. The red line indicates the threshold value of the significance  
377 corresponding to  $-\log_{10}(p) = 4$ .

378 **Fig. 2.** Wheat EigenGWAS for the first ten principal components (PCs). Circular plots of the two  
379 wheat panels investigated are shown. Highly significant PCs are in the inner circle and the least  
380 significant outer circle are displayed. Genetic positions based on a consensus map (41) are  
381 displayed for (A) UK winter and (B) Brazilian spring wheat panels. Chromosomal introgressions  
382 significant across multiple PCs are highlighted (See **SI Appendix, Table S9**).

383 **Fig. 3.** Barley EigenGWAS for the first ten principal components (PCs). Circular plots of the four  
384 panels are shown. Highly significant PCs are in the inner circle and the least significant outer circle  
385 are displayed. Pseudo-genetic map positions that relate to the physical positions (40) are displayed  
386 for (A) UK winter and (B) UK spring barley panels. Chromosomal introgressions significant across  
387 multiple PCs are highlighted (See **SI Appendix, Table S11**).



## 388 References

- 389 1. R. A. Fischer, G. O. Edmeades, Breeding and cereal yield progress. *Crop Science* **50**, S-85-  
390 S-98 (2010).
- 391 2. R. K. Varshney, V. K. Singh, A. Kumar, W. Powell, M. E. Sorrells, Can genomics deliver  
392 climate-change ready crops? *Current Opinion in Plant Biology* **45**, 205–211 (2018).
- 393 3. T. Chiurugwi, S. Kemp, W. Powell, L. T. Hickey, Speed breeding orphan crops. *Theoretical*  
394 *and Applied Genetics* **132**, 607–616 (2019).
- 395 4. P. K. Ingvarsson, N. R. Street, Association genetics of complex traits in plants. *New*  
396 *Phytologist* **189**, 909–922 (2011).
- 397 5. D. Macarthur, Methods: Face up to false positives. *Nature* **487**, 427–428 (2012)
- 398 6. I. Mackay, H.P. Piepho, A. A. F. Garcia, “Statistical methods for plant breeding” in *Handbook*  
399 *of Statistical Genomics*, (John Wiley & Sons, Ltd, 2019), pp. 501–520.
- 400 7. X. Huang, B. Han, Natural variations and genome-wide association studies in crop plants.  
401 *Annual Review of Plant Biology* **65**, 531–551 (2014).
- 402 8. J. Cockram, *et al.*, Genome-wide association mapping to candidate polymorphism resolution  
403 in the unsequenced barley genome. *Proceedings of the National Academy of Sciences of*  
404 *the United States of America* **107**, 21611–21616 (2010).
- 405 9. L. Ramsay, *et al.*, *INTERMEDIUM-C*, a modifier of lateral spikelet fertility in barley, is an  
406 ortholog of the maize domestication gene *TEOSINTE BRANCHED 1*. *Nature Genetics* **43**,  
407 169–172 (2011).
- 408 10. J. Comadran, *et al.*, Natural variation in a homolog of *Antirrhinum CENTRORADIALIS*  
409 contributed to spring growth habit and environmental adaptation in cultivated barley. *Nature*  
410 *Genetics* **44**, 1388–1392 (2012).
- 411 11. M. T. Hamblin, E. S. Buckler, J. L. Jannink, Population genetics of genomics-based crop  
412 improvement methods. *Trends Genet* **27**, 98–106 (2011).
- 413 12. J. Li, *et al.*, Identifying loci with breeding potential across temperate and tropical adaptation  
414 via EigenGWAS and EnvGWAS. *Molecular Ecology* **28**, 3544–3560 (2019).
- 415 13. I. Mackay, *et al.*, Reanalyses of the historical series of UK variety trials to quantify the  
416 contributions of genetic and environmental factors to trends and variability in yield over time.  
417 *Theoretical and Applied Genetics* **122**, 225–238 (2011).
- 418 14. T. N. Rowan, *et al.*, Powerful detection of polygenic selection and environmental adaptation  
419 in US beef cattle populations. Detecting ongoing selection with Generation Proxy Selection  
420 Mapping (GPSM). *BioRxiv* (2020) <https://doi.org/10.1101/2020.03.11.988121>.
- 421 15. G. B. Chen, S. H. Lee, Z. X. Zhu, B. Benyamin, M. R. Robinson, EigenGWAS: Finding loci  
422 under selection through genome-wide association studies of eigenvectors in structured  
423 populations. *Heredity* **117**, 51–61 (2016).
- 424 16. J. Cockram, R. Horsnell, E. hee Soh, C. Norris, D. M. O’Sullivan, Molecular and phenotypic  
425 characterization of the alternative seasonal growth habit and flowering time in barley  
426 (*Hordeum vulgare* ssp. *vulgare* L.). *Molecular Breeding* **35**, 165 (2015).
- 427 17. J. Cockram, *et al.*, Control of flowering time in temperate cereals: genes, domestication, and  
428 sustainable productivity. *Journal of Experimental Botany* **58**, 1231–1244 (2007).
- 429 18. M. F. Scott, *et al.*, Limited haplotype diversity underlies polygenic trait architecture across 70  
430 years of wheat breeding. *bioRxiv* (2020). <https://doi.org/10.1101/2020.09.15.296533>
- 431 19. J. S. Heslop-Harrison, A. R. Leitch, T. Schwarzacher, K. Anamthawat-Jónsson, Detection  
432 and characterization of 1B/1R translocations in hexaploid wheat. *Heredity* **65**, 385–392



- 433 (1990).
- 434 20. S. Rajaram, C. Mann, G. Ortiz-Ferrara, A. Mujeeb-kazi, Adaptation, stability and high yield  
435 potential of certain 1B/1R CIMMYT wheats. in *In: Sakamoto S. (Ed); "Proc. 6th Int. Wheat.  
436 Genet. Symp."*, Kyoto University, Japan., (1983), pp. 613–621.
- 437 21. H. Cheng, *et al.*, Frequent intra- and inter-species introgression shapes the landscape of  
438 genetic variation in bread wheat. *Genome Biology* **20**, 1–16 (2019).
- 439 22. O. Rodrigues, J. C. B. Lhamby, A. D. Didonet, J. A. Marchese, Fifty years of wheat breeding  
440 in Southern Brazil: Yield improvement and associated changes. *Pesquisa Agropecuaria  
441 Brasileira* **42**, 817–825 (2007).
- 442 23. H. Chen, *et al.*, Combinatorial evolution of a terpene synthase gene cluster explains terpene  
443 variations in *oryza*. *Plant Physiology* **182**, 480-492 (2020).
- 444 24. I. H. Jørgensen, Discovery, characterization and exploitation of *Mlo* powdery mildew  
445 resistance in barley. *Euphytica* **63**, 141–152 (1992).
- 446 25. L. Yang, *et al.*, QTL mapping for grain yield-related traits in bread wheat via SNP-based  
447 selective genotyping. *Theoretical and Applied Genetics* **133**, 857–872 (2020).
- 448 26. H. Lehnert, A. Serfling, W. Friedt, F. Ordon, Genome-wide association studies reveal  
449 genomic regions associated with the response of wheat (*Triticum aestivum* L.) to  
450 mycorrhizae under drought stress conditions. *Frontiers in Plant Science* **871** (2018).
- 451 27. C. D. Zanke, *et al.*, Analysis of main effect QTL for thousand grain weight in European winter  
452 wheat (*Triticum aestivum* L.) by genome-wide association mapping. *Frontiers in Plant  
453 Science* **6**, 1–14 (2015).
- 454 28. N. Fradgley, *et al.*, A large-scale pedigree resource of wheat reveals evidence for adaptation  
455 and selection by breeders. *PLoS Biology* **17**, 1–20 (2019).
- 456 29. U. Beukert, *et al.*, The potential of hybrid breeding to enhance leaf rust and stripe rust  
457 resistance in wheat. *Theoretical and Applied Genetics* **133**, 2171–2181 (2020).
- 458 30. M. Helguera, *et al.*, PCR assays for the Lr37-Yr17-Sr38 cluster of rust resistance genes and  
459 their use to develop isogenic hard red spring wheat lines *Crop Science* **43**, 1839-1847  
460 (2003).
- 461 31. M. E. Looseley, *et al.*, Association mapping of malting quality traits in UK spring and winter  
462 barley cultivar collections. *Theoretical and Applied Genetics* **133**, 2567–2582 (2020).
- 463 32. X. Xu, *et al.*, Genome-Wide Association Analysis of Grain Yield-Associated Traits in a Pan-  
464 European Barley Cultivar Collection. *The Plant Genome* **11**, 11 (2018).
- 465 33. R. Sharma, *et al.*, Genome-wide association of yield traits in a nested association mapping  
466 population of barley reveals new gene diversity for future breeding. *Journal of Experimental  
467 Botany* **69**, 3811–3822 (2018).
- 468 34. B. S. Gill, B. R. Friebe, F. F. White, Alien introgressions represent a rich source of genes for  
469 crop improvement. *Proceedings of the National Academy of Sciences of the United States of  
470 America* **108**, 7657–7658 (2011).
- 471 35. V. Haahr, D. von Wettstein, Studies of an induced high-yielding dwarf-mutant of spring  
472 barley . *3rd International Barley Genetics Symposium* , 215-218 Barley Genetics III. (1976).
- 473 36. Y. Zhang, *et al.*, Analysis of the functions of *TaGW2* homoeologs in wheat grain weight and  
474 protein content traits. *Plant Journal* **94**, 857–866 (2018).
- 475 37. A. R. Bentley, *et al.*, Applying association mapping and genomic selection to the dissection  
476 of key traits in elite European wheat. *Theoretical and Applied Genetics* **127**, 2619-2633  
477 (2014).

- 478 38. O. Ladejobi, *et al.*, Reference Genome Anchoring of High-Density Markers for Association  
479 Mapping and Genomic Prediction in European Winter Wheat. *Frontiers in Plant Science*  
480 **10**, 1278 (2019).
- 481 39. G. Mellers, *et al.*, Genetic Characterization of a Wheat Association Mapping Panel Relevant  
482 to Brazilian Breeding Using a High-Density Single Nucleotide Polymorphism Array. *G3*  
483 (*Bethesda, Md.*) **10**, 2229–2239 (2020).
- 484 40. M. M. Bayer, *et al.*, Development and Evaluation of a Barley 50k iSelect SNP Array.  
485 *Frontiers in Plant Science* **8**, 1–10 (2017).
- 486 41. S. Wang, *et al.*, Characterization of polyploid wheat genomic diversity using a high-density  
487 90,000 single nucleotide polymorphism array. *Plant Biotechnology Journal* **12**, 787–796  
488 (2014).
- 489 42. C. Sun, *et al.*, The Wheat 660K SNP array demonstrates great potential for marker-assisted  
490 selection in polyploid wheat. *Plant Biotechnology Journal* **18**, 1354–1360 (2020).
- 491 43. U. R. Rosyara, W. S. De Jong, D. S. Douches, J. B. Endelman, Software for Genome-Wide  
492 Association Studies in Autopolyploids and Its Application to Potato. *The Plant Genome* **9**, 2  
493 (2016).
- 494 44. X. Zheng, *et al.*, A high-performance computing toolset for relatedness and principal  
495 component analysis of SNP data. *Bioinformatics* **28**, 3326–3328 (2012).
- 496 45. P. M. VanRaden, Efficient Methods to Compute Genomic Predictions. *Journal of Dairy*  
497 *Science* **91**, 4414–4423 (2008).
- 498 46. S. D. Turner, qqman: an R package for visualizing GWAS results using Q-Q and manhattan  
499 plots. *Journal of Open Source Software* (2018) <https://doi.org/10.21105/joss.00731>.
- 500 47. L. Yin, *et al.*, rMVP: A Memory-efficient, Visualization-enhanced, and Parallel-1 accelerated  
501 tool for Genome-Wide Association Study. *bioRxiv* (2020)  
502 <https://doi.org/10.1101/2020.08.20.258491>.
- 503 48. I. J. Mackay, *et al.*, An eight-parent multiparent advanced generation inter-cross population  
504 for winter-sown wheat: Creation, properties, and validation. *G3: Genes, Genomes, Genetics*  
505 (2014) <https://doi.org/10.1534/g3.114.012963>.

## 506 **Supplementary Figures**

507 **Fig S1.** Linear trend in variety year of release and yield (t/ha). (A) UK wheat; (B) UK barley.

508 **Fig S2.** UK barley Manhattan plots for EnvGWAS from combined winter and spring varieties

509 ( $n=704$ ). (A) Manhattan for the age from the analysed barley varieties; (B) analysis using seasonal  
510 growth-habit (winter and spring-type) as a covariate; (C); GWAS analysis of seasonal growth-habit;  
511 (D) GWAS analysis of seasonal growth habit with the four peaks identified in C as covariates.

512 **Fig S3.** UK winter wheat Manhattan plots for EnvGWAS validation using a subset of 192 varieties.

513 Manhattan plots are shown for: (A) the first year of variety in National trial; (B) the last year each  
514 variety is enlisted on the national list; (C) variety life-span, i.e. how long a variety is on the national  
515 list; (D) GWAS on yield.

516 **Fig S4.** UK barley Manhattan plots for EnvGWAS validation using a subset of 197 varieties.  
517 Manhattan plots are shown for: (A) the first year of variety in National trial; (B) the last year each  
518 variety is enlisted in the national list; (C) variety life-span, i.e. how long a variety is on the national  
519 list; (D) GWAS on yield.

520 **Fig S5.** Rocket-plots displaying temporal changes in allele frequencies in wheat (UK-wheat: A-D &  
521 Brazilian-wheat: E-H) and barley panels (winter: I-J & spring: K-N). Also displayed wheat  
522 categories in parenthesis within the panel.

523 **Supplementary Tables**

524

**Table 1.** Summary of the significant hits detected by EnvGWAS on variety age. Details in SI Appendix, Table S1 & Table S2.

| Pop-name       | SNP-name          | Chrom | Position (cM) | Ref-allele | Ref-Allele-F | -log(p) | Effects |
|----------------|-------------------|-------|---------------|------------|--------------|---------|---------|
| Winter-Wheat   | wsnp_Ex_c572_1A   | 1A    | 221.0         | A          | 0.50         | 6.01    | -7.61   |
|                | Kukri_c18109_1B   | 1B    | 350.0         | A          | 0.92         | 4.62    | 11.64   |
|                | Excalibur_c153_2A | 2A    | 20.0          | A          | 0.66         | 6.31    | 9.50    |
|                | RFL_Contig403_2A  | 2A    | 62.0          | A          | 0.65         | 5.24    | 8.32    |
|                | BS00071630_5_2A   | 2A    | 87.0          | A          | 0.66         | 6.18    | 9.26    |
|                | IACX6178_2A       | 2A    | 158.0         | A          | 0.66         | 6.18    | 9.26    |
|                | BS00022799_5_2D   | 2D    | 33.0          | A          | 0.66         | 6.31    | 9.50    |
|                | BobWhite_rep_5B   | 5B    | 381.0         | A          | 0.13         | 4.31    | 6.94    |
|                | BS00021901_5_5D   | 5D    | 180.0         | T          | 0.85         | 5.04    | 9.58    |
|                | BS00022120_5_6A   | 6A    | 190.0         | T          | 0.83         | 8.11    | 12.87   |
|                | Kukri_c16404_6B   | 6B    | 322.0         | A          | 0.06         | 4.06    | 10.33   |
|                | Kukri_c67076_7A   | 7A    | 383.0         | A          | 0.14         | 4.29    | 8.48    |
|                | BobWhite_c429_7B  | 7B    | 236.0         | A          | 0.94         | 4.88    | -12.92  |
| Spring-Wheat   | Ku_c5725_892_2B   | 2B    | 251.0         | A          | 0.49         | 4.44    | -7.35   |
|                | RFL_Contig484_2B  | 2B    | 318.0         | T          | 0.76         | 4.20    | -9.34   |
|                | RAC875_c8642_5A   | 5A    | 710.0         | A          | 0.08         | 4.51    | -13.21  |
| Winter-Barley  | JHI-Hv50k-201_3H  | 3H    | 68.7          | A          | 0.29         | 4.74    | -1.95   |
|                | JHI-Hv50k-201_3H  | 3H    | 124.5         | C          | 0.64         | 4.22    | 1.71    |
|                | JHI-Hv50k-201_5H  | 5H    | 19.2          | A          | 0.73         | 5.92    | -1.87   |
| Spring-Barley  | JHI-Hv50k-201_1H  | 1H    | 51.0          | A          | 0.41         | 4.08    | -3.07   |
|                | SCRI_RS_1486_2H   | 2H    | 0.0           | A          | 0.42         | 5.17    | -2.59   |
|                | JHI-Hv50k-201_3H  | 3H    | 1.7           | C          | 0.22         | 4.40    | 3.69    |
|                | JHI-Hv50k-201_3H  | 3H    | 77.7          | C          | 0.95         | 4.52    | -4.42   |
|                | JHI-Hv50k-201_5H  | 5H    | 20.5          | C          | 0.12         | 4.90    | 3.38    |
|                | 12_30230_6H       | 6H    | 53.1          | A          | 0.88         | 5.22    | 4.45    |
|                | JHI-Hv50k-201_7H  | 7H    | 7.8           | A          | 0.93         | 5.40    | 5.37    |
| Spring&Winter- | JHI-Hv50k-201_2H  | 2H    | 0.0           | C          | 0.74         | 4.17    | -2.15   |
|                | JHI-Hv50k-201_2H  | 2H    | 20.3          | C          | 0.92         | 5.74    | -2.86   |
|                | JHI-Hv50k-201_3H  | 3H    | 45.2          | C          | 0.92         | 4.15    | 3.07    |
|                | JHI-Hv50k-201_3H  | 3H    | 68.7          | C          | 0.14         | 7.13    | -4.41   |
|                | JHI-Hv50k-201_3H  | 3H    | 126.6         | C          | 0.80         | 4.29    | 3.64    |
|                | JHI-Hv50k-201_5H  | 5H    | 19.2          | C          | 0.82         | 7.67    | -3.43   |
|                | JHI-Hv50k-201_5H  | 5H    | 105.0         | A          | 0.09         | 4.51    | 3.53    |
|                | 11_20546_5H       | 5H    | 160.7         | A          | 0.89         | 4.70    | -2.94   |
|                | JHI-Hv50k-201_7H  | 7H    | 3.8           | C          | 0.05         | 5.56    | -4.65   |

**Table 2:** Collocation of significant loci ( $-\log(p) > 3$ ) in MAGIC with the three major winter wheat GWAS peaks. Collocation used 35K and 90K physical maps.

| <b>Trait (MAGIC coding)</b>            | <b>Trait decription</b>      | <b>Region</b> |
|----------------------------------------|------------------------------|---------------|
| GLA_on_31_03_17_Year1                  | Grain Length and Area        | 1A            |
| waxiness_leaf_score_Year1              | Waxiness                     | 1A            |
| FL_length_x_width_Year1                | Flag-leaf length             | 1A            |
| Pigmentation_score_Year1               | Pigmentation-score           | 1A            |
| Height_FL_to_ear_base_Year1            | Height                       | 1A            |
| Spikelets_paired_frequency_in_20_Year1 | Spikelets-pair-freq          | 1A            |
| Spring_type_Year1                      | Spring-type                  | 1A            |
| Yellow_rust_on_11_05_17_Year1          | Yellow-rust                  | 2A            |
| GLA_on_20_04_17_Year1                  | Grain Length and Area        | 2A            |
| Chlorosis_score_Year1                  | Chlorosis-score              | 2A            |
| GS65_DAS_Year1                         | Heading                      | 2A            |
| FL_width_Year1                         | Flag-leaf width              | 2A            |
| Yield_Year1                            | Yield                        | 2A            |
| GLA_on_07_03_17_Year1                  | Grain Length and Area        | 6A            |
| waxiness_leaf_score_Year1              | Waxiness                     | 6A            |
| FL_angle_Year1                         | Flag-leaf angle              | 6A            |
| FL_length_Year1                        | Flag-leaf length             | 6A            |
| FL_length_x_width_Year1                | Flag leaf area               | 6A            |
| FL_length_width_ratio_Year1            | Flag leaf length/width ratio | 6A            |
| Height_to_FL_Year1                     | Height                       | 6A            |
| Height_to_ear_base_Year1               | Height                       | 6A            |
| Height_to_ear_tip_Year1                | Height                       | 6A            |
| Ear_length_Year1                       | Ear-length                   | 6A            |
| Height_FL_to_ear_base_Year1            | Height                       | 6A            |

**A**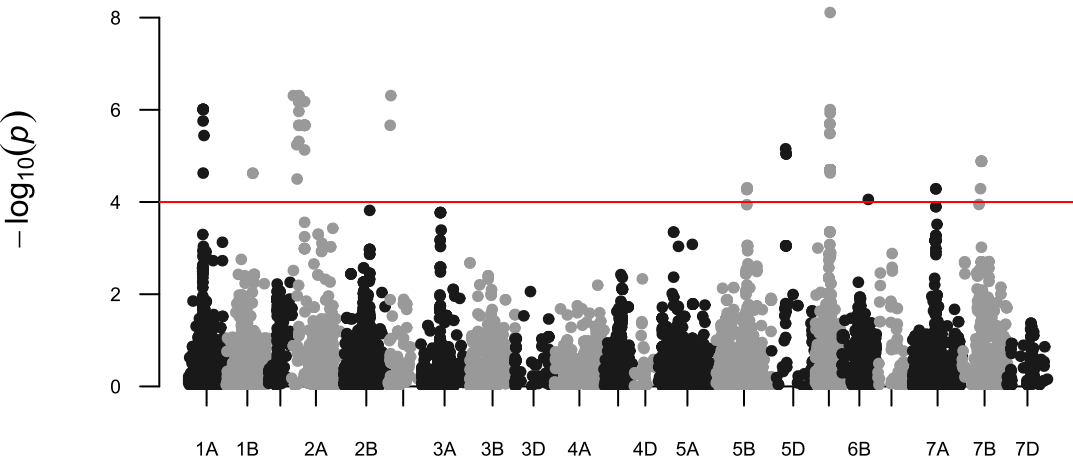**B**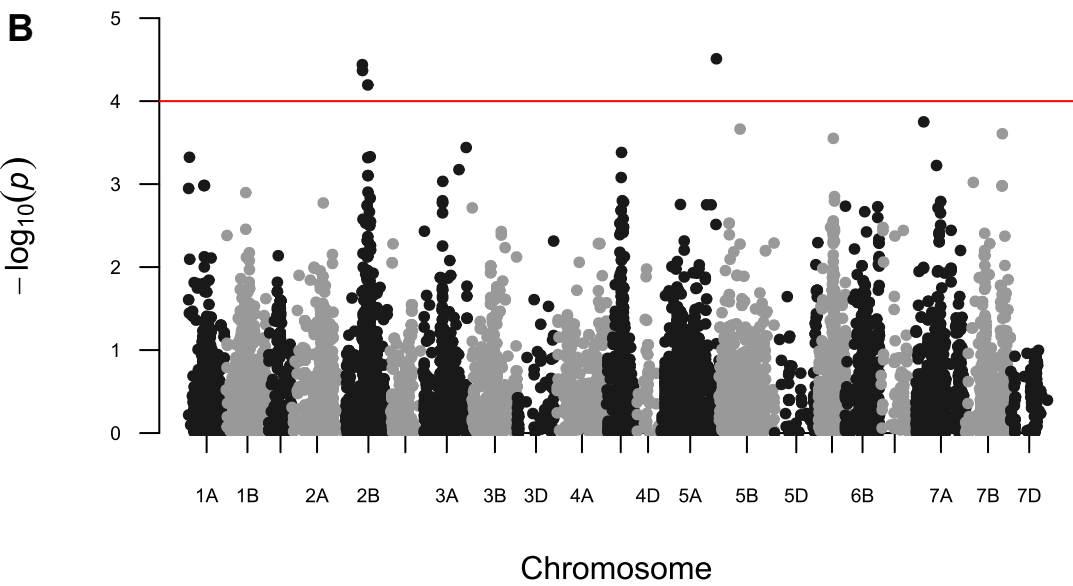**C**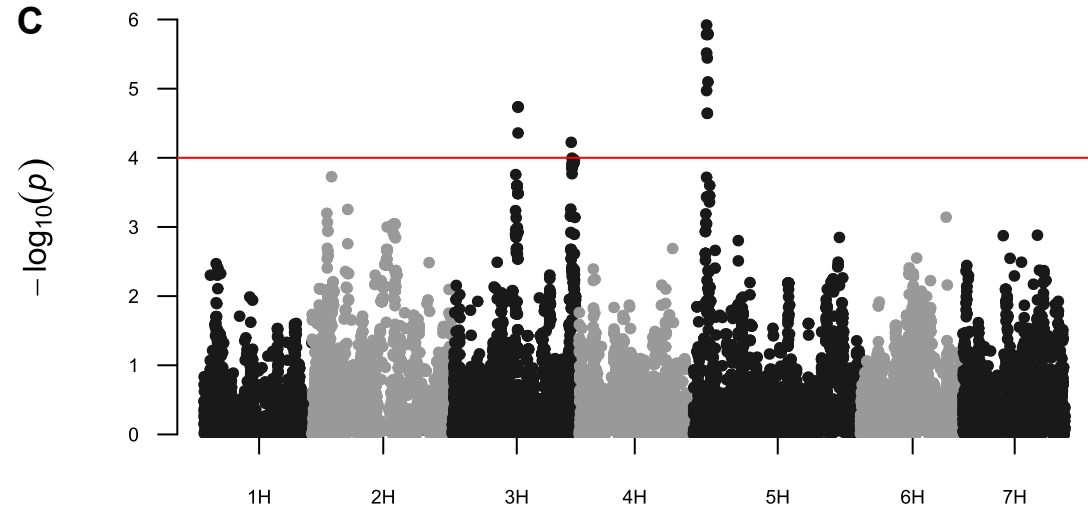**D**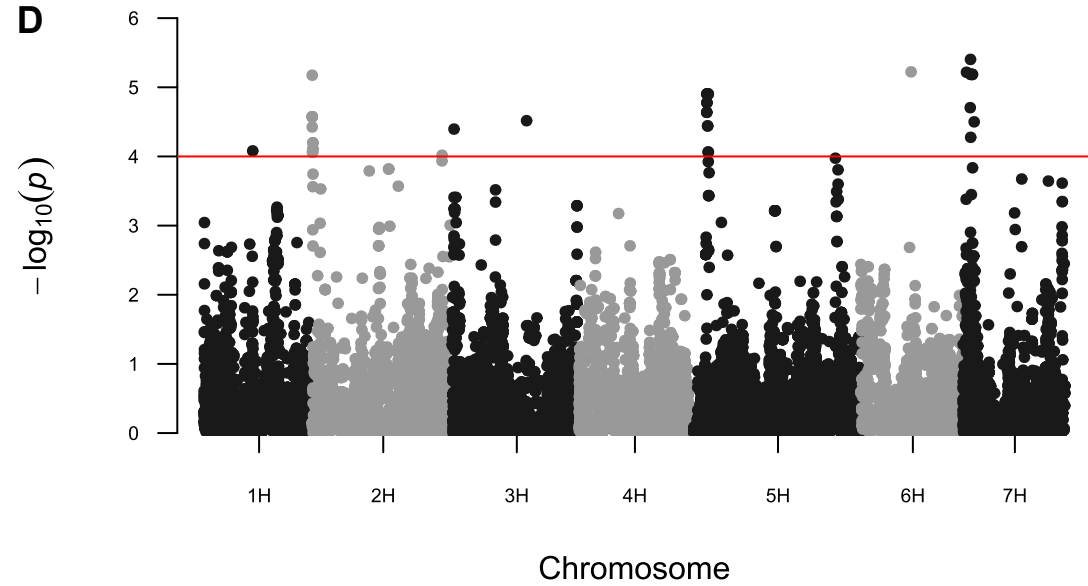

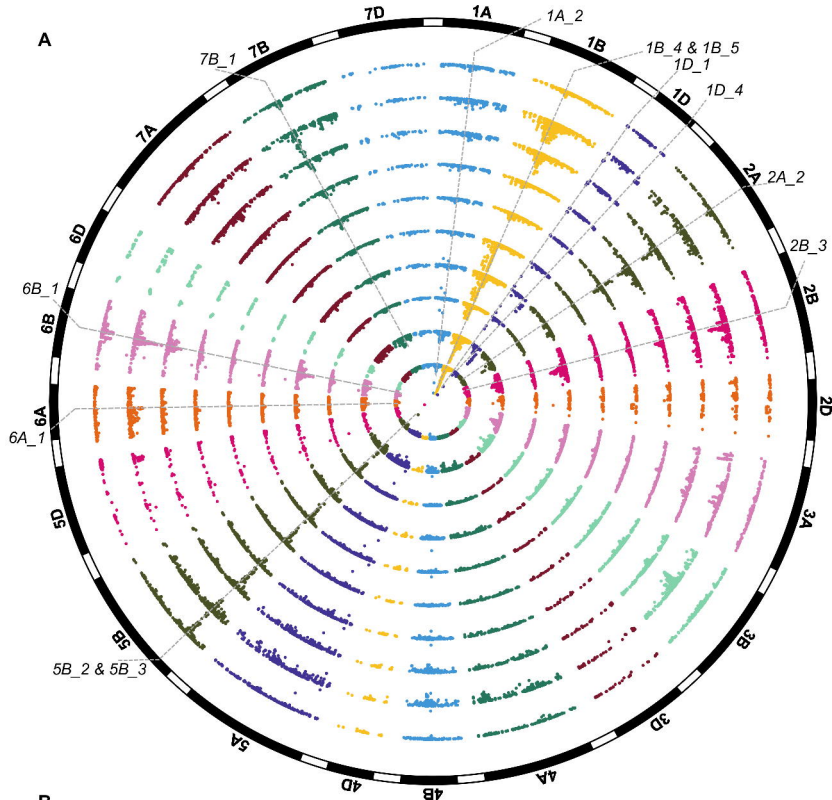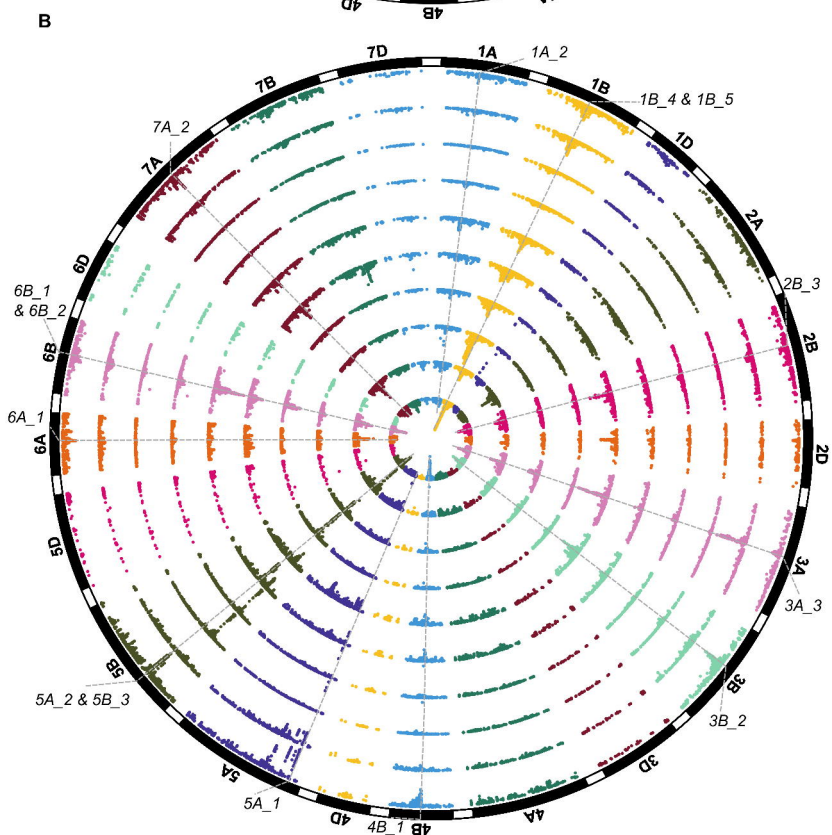



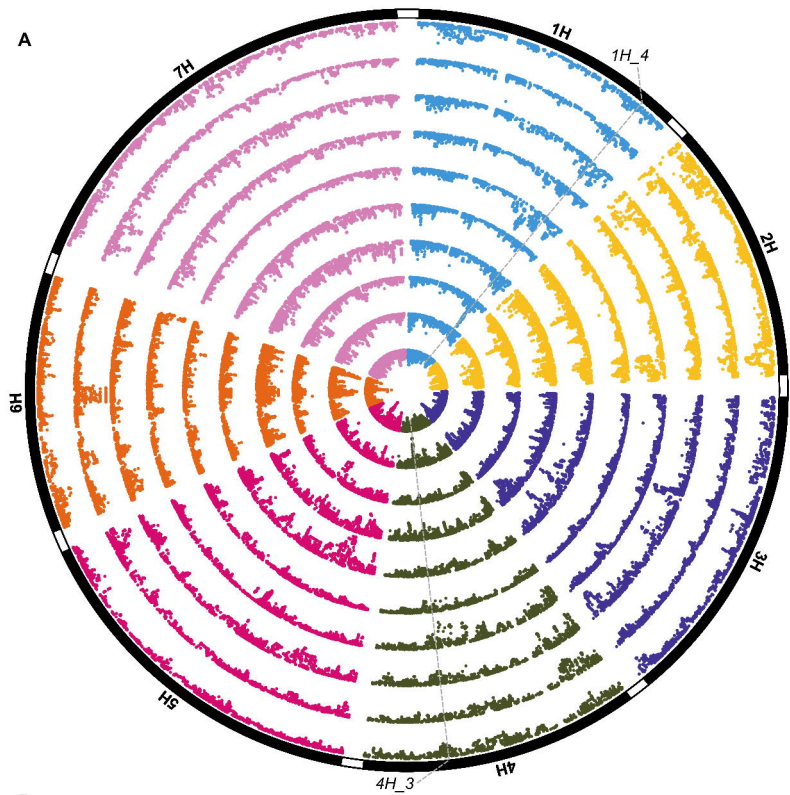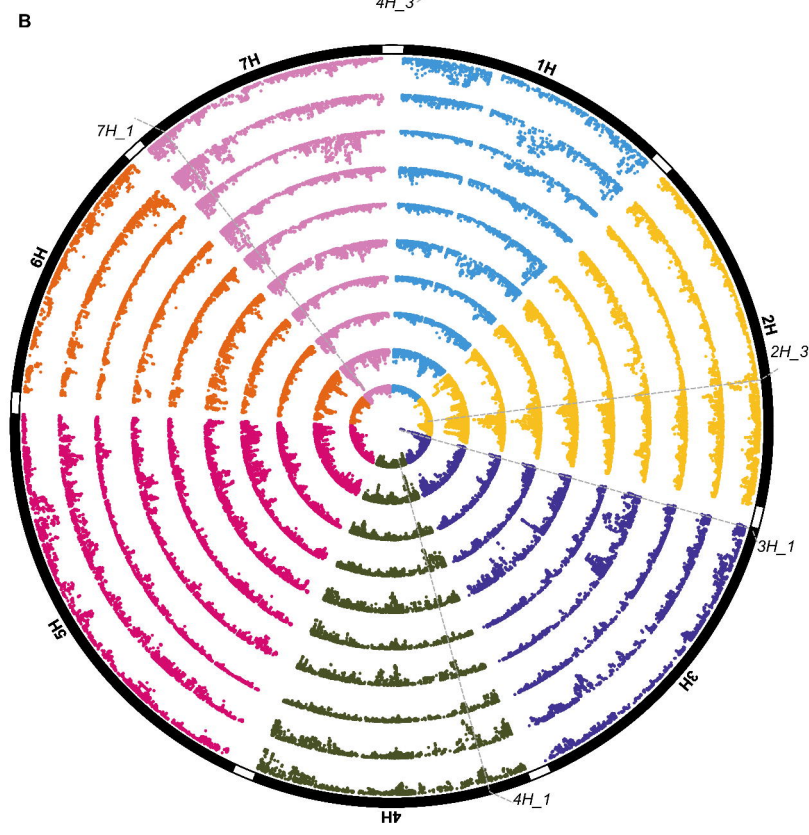

Source: https://www.biorxiv.org/content/10.1101/2020.11.27.400333v1.full.pdf
